1  
2  
3  
4  
5  
6  
7  
8  
9  
10  
11  
12  
13  
14  
15

## Effect of intensity of agronomic practices on the yield of two breeding types of winter oilseed rape cultivars

Marek Wójtowicz<sup>1\*</sup>, Andrzej Wójtowicz<sup>2</sup>, Ewa Jajor<sup>2</sup>, Marek Korbas<sup>2</sup>, Franciszek Wielebski<sup>1</sup>

<sup>1</sup>Plant Breeding and Acclimatization Institute—National Research Institute, Independent Laboratory of Oilseed Crops Environmental Stress, Poznań, Poland

<sup>2</sup>Plant Protection Institute—National Research Institute, Department of Mycology, Poznań, Poland

\* Corresponding author

E-mail: [marekw@nico.ihar.poznan.pl](mailto:marekw@nico.ihar.poznan.pl)

### Abstract

The effect of three fungicide treatment programmes and the level of spring nitrogen fertilisation on the seed yield of two types of cultivars of *Brassica napus* L. sown at two different seeding rates was studied in a field experiment carried out in a split-split-plot design. The subject of the study was an open-pollinated cultivar (Casoar) and a restored hybrid cultivar (Visby). Three plant protection programmes, two levels of spring nitrogen fertilisation (160 and 220 kg N·ha<sup>-1</sup>), and two different seeding rates for each cultivar (Visby—50 and 70 seeds·m<sup>-2</sup>; Casoar—60 and 80 seeds·m<sup>-2</sup>) were included. The most intensive protection programme

24 comprised three fungicide treatments: first in autumn at the six-leaves-unfolded stage—BBCH  
25 16, second in spring at the stem elongation stage—BBCH 33, and third at the full flowering  
26 stage—BBCH 65. One of two less intensive programmes of plant protection included fungicide  
27 application in autumn at the six-leaves-unfolded stage—BBCH 16 and at the full flowering  
28 stage—BBCH 65, while the second included fungicide application in spring at the stem  
29 elongation stage—BBCH 33 and at the full flowering stage—BBCH 65.

30 The effectiveness of the protection programmes and nitrogen fertilisation was  
31 influenced by the intensity of abiotic stress factors. However, the average yield from the plots  
32 protected against pathogens was significantly higher than that from the untreated plots. The  
33 increase of nitrogen fertilisation from 160 to 220 kg·ha<sup>-1</sup> also caused significant increase of  
34 average seed yield. The yield of cultivar Visby was higher and less dependent on the seeding  
35 rate compared to cultivar Casoar. Cultivars responded similarly to plant protection programmes  
36 and the rate of nitrogen fertilisation in spring. Higher yields of Visby cultivar can be attributed  
37 to the higher number of seeds per silique and the higher number of siliques per m<sup>2</sup>.

38

## 39 **Introduction**

40 Crop yields are shaped by advances in breeding progress, which result in varieties with  
41 favourable properties, and intensification of cultivation treatments. In the northern hemisphere  
42 characterised by a cold climate, the only commonly cultivated oilseed crop is oilseed rape  
43 (*Brassica napus* L.). The possibility of using oilseed rape in the food [1] and feed [25] industry,  
44 as well as in the generation of energy [26], especially biofuels, has significantly contributed to  
45 the increase in the cultivation area of this oilseed crop (0.6 million ha·year<sup>-1</sup> between 1997 and  
46 2017) [7]. Increase of the cultivation area as well as the level of yield of oilseed rape recorded  
47 since the early 1990s [9, 45] reflects the interest in rapeseed of the food and feed industry,

48 which was gained after the introduction of the double-improved variety with no erucic acid and  
49 reduced glucosinolate, and the energy industry using rapeseed oil in biofuel production. The  
50 possibility of growing rapeseed for energy purposes has contributed to the increase in the  
51 cultivation area of this oilseed plant, and also to its higher yields obtained in Poland.

52 The sown area and yield of oilseed rape increased, respectively, from 0.4 million ha and  
53 2.1 Mg·ha<sup>-1</sup> on average during 2001–2003 before Poland's accession to the European Union to  
54 0.9 million ha and 3.0 Mg·ha<sup>-1</sup> in the years 2014–2016 [32]. Such a significant increase in the  
55 area stimulates the demand for high- and stable-yielding cultivars that react efficiently to  
56 cultivation treatments and justifies the intensification of production strongly conditioned by  
57 economic factors. The yields of oilseed rape are shaped on the one hand by the yield potential  
58 of the variety [24], its tolerance/resistance to biotic and abiotic stress [41], and on the other  
59 hand by cultivation technology, the aim of which is to provide the most favourable conditions  
60 for the development of crops and to limit crop losses. The resistance of cultivars to biotic and  
61 abiotic stresses is particularly important. Cultivars that exhibit good tolerance to stressful  
62 conditions have a better chance of showing good yield potential because the seasons  
63 characterised by unfavourable weather conditions for the development of oilseed rape are not  
64 uncommon in Poland. For this reason, one of the objectives of the present research is to  
65 understand the adaptive abilities of the types of rapeseed cultivars studied to changing  
66 environmental conditions. The working hypothesis assumes the overriding role of cultivars'  
67 resistance to abiotic stresses in shaping their yield level. The shortage of precipitation during  
68 the stages characterised by the greatest demand for water and low temperatures during winter  
69 dormant period, which can be seen frequently in Poland, affecting the development of plants  
70 may contribute to a significant decrease in the yield level of rape cultivars. In addition, excess  
71 of rainfall can limit the yields, especially in the case of cultivars susceptible to infection,  
72 because it induces infections and the spreading of pathogens. An effective way to protect plants

73 from pathogens is fungicide treatment [12, 29, 47]. The dependence of humidity conditions of  
74 the oilseed rape canopy on the plant density derived from the amount of seeds sown justifies  
75 research into the effectiveness of protection against pathogens at different sowing rates. The  
76 constant increase of importance of chemical protection against pathogens in the technology of  
77 oilseed rape [42] and the decisive significance of the amount of seeds sown for the yield level  
78 confirm the accuracy of the selection of these experimental factors. Moreover, the variability  
79 of cultivars' resistance to pathogens [14-15] justifies undertaking research aimed at determining  
80 their response to the intensification of this factor of production, although it is rare to find results  
81 presenting variation in the yields of cultivars resulting from the intensification of protection  
82 [10]. Another factor included in this research mainly due to its stimulating impact on the  
83 development and yield of rapeseed [2, 6, 30-31], as well as on infection by pathogens [37], is  
84 spring nitrogen fertilisation. Understanding the impact of the intensification of nitrogen  
85 fertilisation on the development and yielding of the types of rapeseed cultivars compared here  
86 is another goal of the present work. The choice of experimental factors studied in this work was  
87 also dictated by their significant role in determining cultivation costs. According to Budzyński  
88 and Ojczyk [5], fertilisation and protection account for almost 80% of the cultivation costs of  
89 oilseed rape.

90

## 91 **Materials and methods**

92 The experiment was conducted in 2012–2014 at the Experimental Station of Plant Breeding  
93 Smolice Ltd, Co. in Łagiewniki (N 51° 46', E 17° 14'). It was a three-factor type and was laid  
94 out in a split-split-plot design with four replications. The main plot factor was the programme  
95 of protection against pathogens (Table 1). Three programmes of fungicide application and a  
96 control treatment were included in the experiment. The most intensive protection programme  
97 comprised three fungicide applications: first in autumn at the six-leaves-unfolded stage—

98 BBCH 16, second in spring at the stem elongation stage—BBCH 33, and third at the full  
99 flowering stage—BBCH 65. In addition, two less intensive programmes of plant protection  
100 were included: the first one involved fungicide application in autumn at the six-leaves-unfolded  
101 stage—BBCH 16 and at the full flowering stage—BBCH 65, while the second involved  
102 fungicide application in spring at the stem elongation stage—BBCH 33 and at full flowering  
103 stage—BBCH 65. In autumn, metconazole (5-[(4-chlorophenyl)methyl]-2,2-dimethyl-1-(1H-  
104 1,2,4-triazol-1-ylmethyl) cyclopentanol) was applied at 60 g·ha<sup>-1</sup>. At the stem elongation stage,  
105 prothioconazole (2-[2-(1-chlorocyclopropyl)-3-(2-chlorophenyl)-2-hydroxypropyl]-1,2-  
106 dihydro-3H-1,2,4-triazole-3-thione) was applied at 80 g·ha<sup>-1</sup> and tebuconazole ( $\alpha$ -(2-(4-  
107 chlorophenyl)ethyl)- $\alpha$ -(1,1-dimethylethyl)-1H-1,2,4-triazole-1-ethanol) was applied at 160  
108 g·ha<sup>-1</sup>. At the flowering stage, dimoxystrobin (( $\alpha$ E)-2-[(2,5-dimethylphenoxy)methyl]- $\alpha$ -  
109 (methoxyimino)-N-methylbenzeneacetamide) at 100 g·ha<sup>-1</sup> and boscalid (2-chloro-N-(4'-  
110 chloro[1,1'-biphenyl]-2-yl)-3-pyridinecarboxamide) at 100 g·ha<sup>-1</sup> were applied. The subplot  
111 factor was the rate of nitrogen fertilisation. Nitrogen fertiliser was applied at two levels: 160  
112 and 220 kg N·ha<sup>-1</sup>. The sub-subplot factor was represented by cultivars sown at different seeding  
113 rates; open-pollinated cultivar Casoar was sown at a seeding rate of 60 and 80 seeds·m<sup>-2</sup>, while  
114 the fertility-restored hybrid cultivar Visby was sown at 50 and 70 seeds·m<sup>-2</sup>. The experiment  
115 was carried out on proper brown soil formed from heavy clay sand, on light or middle clay, of  
116 quality class IIIa and good wheat complex. The winter oilseed rape crops previously cultivated  
117 on the soil were rye, lucerne, and spring wheat. The chemical constituents of the soil were as  
118 follows: P<sub>2</sub>O<sub>5</sub>, 221–276 mg·kg<sup>-1</sup>; K<sub>2</sub>O, 135–191 mg·kg<sup>-1</sup>; Mg, 31–73 mg·kg<sup>-1</sup>; and N, min 6.6–  
119 9.4 mg·kg<sup>-1</sup>. The pH of the soil ranged from 6.3 to 7.2 when measured using 1 M KCl. Before  
120 sowing, the field received 20–25 kg N·ha<sup>-1</sup> (ammonium nitrate), 51–80 kg P<sub>2</sub>O<sub>5</sub>·ha<sup>-1</sup> (triple  
121 superphosphate), and 105–112 kg K<sub>2</sub>O·ha<sup>-1</sup> (60% potash salt). Winter oilseed rape was sown  
122 with 30-cm row spacing on 26–29 August. Plants on all investigated plots were protected using

123 herbicides and insecticides. The dicotyledonous weeds were controlled with metazachlor (2-  
124 chloro-N-(2,6-dimethylphenyl)-N-(1H-pyrazol-1-ylmethyl)acetamide) at a dose of 999 g·ha<sup>-1</sup>  
125 and quinmerac (7-chloro-3-methyl-8-quinolinecarboxylic acid) at a dose of 249 g·ha<sup>-1</sup>, and  
126 volunteer cereals with herbicide cycloxydim (2-[1-(ethoxyimino)butyl]-3-hydroxy-5-  
127 (tetrahydro-2H-thiopyran-3-yl)-2-cyclohexen-1-one) at a dose of 150 g·ha<sup>-1</sup>. Insects were  
128 controlled using lambda-cyhalothrin ((R)-cyano(3-phenoxyphenyl)methyl (1S,3S)-rel-3-((1Z)-  
129 2-chloro-3,3,3-trifluoro-1-propenyl)-2,2-dimethylcyclopropanecarboxylate, 6.25 g·ha<sup>-1</sup>),  
130 tiachloprid ((Z)-(3-((6-chloro-3-pyridinyl)methyl)-2-thiazolidinylidene)cyanamide, 6.0 g·ha<sup>-1</sup>),  
131 deltamethrin ((S)-cyano(3-phenoxyphenyl)methyl (1R,3R)-3-(2,2-dibromoethenyl)-2,2-  
132 dimethylcyclopropanecarboxylate, 60 g·ha<sup>-1</sup>), and acetamiprid ((1E)-N-[(6-chloro-3-  
133 pyridinyl)methyl]-N'-cyano-N-methylethanimidamide, 24 g·ha<sup>-1</sup>). Matured plants were  
134 harvested without swathing using a small-plot combine harvester on 13, 23, and 15 July in 2012,  
135 2013, and 2014, respectively. The plot area to be harvested was 9.6 m<sup>2</sup>.

136 Disease identification and assessment of infection were performed at the ripening stage,  
137 when 40–50% of siliques were ripe—BBCH 84 and 85. The percentage of plants showing  
138 symptoms of white stem rot caused by *Sclerotinia sclerotiorum* and Phoma stem canker caused  
139 by *Leptosphaeria* spp. (anamorph *Phoma lingam*) and the percentage of the surface of silique  
140 showing *Alternaria* spot caused by *Alternaria* spp. and grey mould caused by *Botrytis cinerea*  
141 were determined. The percentage of plants showing symptoms of disease infection was  
142 estimated as mean disease incidence (DI) using the formula:

$$143 \quad DI = AP \times 100 / T,$$

144 where AP is the number of affected plants and T is the total number of examined plants.

145 Stem infection was assessed on all plants on a plot, and silique infection was estimated on 100  
146 siliques randomly selected per plot. Disease severity of silique lesions was determined as the  
147 percentage of disease-affected area of each silique.

148 The plants were counted per unit area on each plot before and after winter and directly  
 149 before harvest. Before the harvest, the number of siliques per plant were counted on 15  
 150 consecutive plants on each plot. Number of seeds per silique was determined by counting the  
 151 number of seeds in 25 siliques sampled randomly from each plot. Weight of 1000 seeds was  
 152 calculated from the weight of 400 seeds taken from the bulk yield samples. Based on the number  
 153 of siliques per plant and the number of plants counted directly before harvest, the number of  
 154 siliques per unit area was determined. Yield of seeds per plot was adjusted to 13% moisture  
 155 content and then converted to Mg·ha<sup>-1</sup>.

156 The experimental data were compared using an analysis of variance (ANOVA). When  
 157 *F*-ratio was significant, the least significant difference was calculated at  $P \leq 0.05$  using Tukey's  
 158 test. ANOVA was performed using STATISTICA software (StatSoft Inc., 2011).

159 Table 1. Experimental factors and levels in the experiment in split-split plot design

| Experimental factor                                                                     | Symbol | Level                                                                                                                                                                                                                    |
|-----------------------------------------------------------------------------------------|--------|--------------------------------------------------------------------------------------------------------------------------------------------------------------------------------------------------------------------------|
| Main plot factor - protection programme (time of application)                           | A      | 60 g·ha <sup>-1</sup> metconazole (BBCH 16), 80 g·ha <sup>-1</sup> prothioconazole and 160 g·ha <sup>-1</sup> tebuconazole (BBCH 33), 100 g·ha <sup>-1</sup> dimoxystrobin and 100 g·ha <sup>-1</sup> boscalid (BBCH 65) |
|                                                                                         |        | 60 g·ha <sup>-1</sup> metconazole (BBCH 16), 100 g·ha <sup>-1</sup> dimoxystrobin and 100 g·ha <sup>-1</sup> boscalid (BBCH 65)                                                                                          |
|                                                                                         |        | 80 g·ha <sup>-1</sup> prothioconazole and 160 g·ha <sup>-1</sup> tebuconazole (BBCH 33), 100 g·ha <sup>-1</sup> dimoxystrobin and 100 g·ha <sup>-1</sup> boscalid (BBCH 65)                                              |
| Subplot factor - spring rate of N fertilizer (kg·ha <sup>-1</sup> )                     | B      | 160                                                                                                                                                                                                                      |
|                                                                                         |        | 220                                                                                                                                                                                                                      |
| Sub-subplot factor - cultivars sown at different seeding rates (seeds·m <sup>-2</sup> ) | C      | Open pollinated cultivar Casoar sown in 60 seeding rate                                                                                                                                                                  |
|                                                                                         |        | Open pollinated cultivar Casoar sown in 80 seeding rate                                                                                                                                                                  |
|                                                                                         |        | Hybrid cultivar Visby sown in 50 seeding rate                                                                                                                                                                            |
|                                                                                         |        | Hybrid cultivar Visby sown in 70 seeding rate                                                                                                                                                                            |

160

## 161 **Results**

162

### 163 **Weather conditions and phenological crop development**

164 The growing seasons in which the experiment was conducted differed significantly in  
165 meteorological conditions and influenced the phenological development of winter oilseed rape  
166 plants (Table 2). The length of the fall growing season ranged from 78 days in 2011 to 94 days  
167 in 2012, and total precipitation from 45.8 mm in 2011 to 109.9 mm in 2013. The most  
168 unfavourable weather condition in autumn was noted in 2013, when the shortage of  
169 precipitation before sowing, the cool and very rainy September and the cool first decade of  
170 October, and the stagnation of vegetation at the end of the second decade of November limited  
171 the development and the number of plants before winter. As a result of these conditions, oilseed  
172 rape plants developed only eight medium-sized leaves before winter, compared to 2011 and  
173 2012 when the crop plants developed 12 large-sized leaves before winter and were in very good  
174 condition. The mean daily temperature during the winter dormancy was determined at -1.0 °C  
175 in 2012–2013 and at 2.9 °C in 2013–2014, while in the coldest decade of winter this parameter  
176 ranged from -12.4 °C in 2011–2012 to -5.3 °C in 2012–2013 (Table 2). In 2013 and 2014, the  
177 climatic condition during winter were conducive to crop overwintering, while in the coldest  
178 decade of 2012, frost reaching -20 °C at night, not accompanied by snowfall did not favour  
179 overwintering of oilseed rape plants. Due to the difference in the beginning of vegetation, the  
180 length of the spring growing season ranged from 106 days in 2013 to 122 days in 2014. The  
181 beginning of vegetation in spring was observed on 16 and 15 March in 2012 and 2014,  
182 respectively, while in 2013, on 8 April. Total precipitation was determined at 170 mm in 2012  
183 and over 244 mm in 2014. A small amount of precipitation until the full flowering phase in  
184 2012 did not favour the production of siliques. In 2013, a similar effect resulted from the late



185 start of vegetation. Water conditions that were much more favourable for the development of  
 186 siliques were observed in 2014. However, abundant rainfall during this flowering season was  
 187 also conducive to plant infection by *S. sclerotiorum*. The seed harvest was carried out on 13,  
 188 23, and 15 July in 2012, 2013, and 2014, respectively.

189

190 Table 2. Fenological development of winter oilseed rape and weatcher conditions (2011-2014)

| Parameter                             | Period                            | Growing season |           |           |           |
|---------------------------------------|-----------------------------------|----------------|-----------|-----------|-----------|
|                                       |                                   | 2011/2012      | 2012/2013 | 2013/2014 | 1957-2014 |
| Number of days                        | Fall growth                       | 78             | 94        | 84        | 95        |
|                                       | Winter dormacy                    | 121            | 129       | 117       | 125       |
|                                       | Spring growth                     | 119            | 106       | 122       | 99        |
|                                       | flowering                         | 20             | 28        | 35        |           |
|                                       | Entire growing season             | 318            | 329       | 323       | 319       |
| Total precipitation (mm)<br>*snowfall | Fall growth                       | 45.8           | 93.9      | 109.9     | 120.7     |
|                                       | The decade of sowing              | 27.6           | 56.3      | 2.5       |           |
|                                       | September/first decade of October | 18.8/5.0       | 34.1/9.8  | 80.7/0.0  | 42.2/     |
|                                       | Winter dormacy                    | 143.3          | 171.5     | 69.6      | 133.4     |
|                                       | The coldest decade in winter      | 1.0*           | 17.3*     | 20.5*     |           |
|                                       | Spring growth                     | 170            | 213.0     | 244.4     | 200.0     |
|                                       | flowering                         | 22.8           | 48.6      | 81.7      |           |
| Entire growing season                 | 348.1                             | 464.9          | 423.9     | 454.1     |           |
| Mean daily temperature (°C)           | Fall growth                       | 9.6            | 9.4       | 9.5       | 8.8       |
|                                       | September/first decade of October | 15.2/12.9      | 14.5/10.4 | 12.6/8.4  | 13.6/     |
|                                       | Winter dormacy                    | 1.0            | -1.0      | 2.9       | 0.3       |
|                                       | The coldest decade in winter      | -12.4          | -5.3      | -7.9      |           |
|                                       | Spring growth                     | 13.8           | 15.8      | 13.7      | 14.1      |
|                                       | flowering                         | 14.7           | 14.0      | 12.4      |           |
| Entire growing season                 | 7.9                               | 7.2            | 8.6       | 7.7       |           |

191

## 193 **Disease control**

194

195 The protective programs significantly affected the occurrence of pathogens on the crop (Tabela  
196 3). All effectively limited the disease symptoms (Table 4). Moreover, by affecting  
197 overwintering of plants and 1000 seed weight significantly affected the yield (Table 5). The  
198 average yield of seeds from the plants subjected to protective programmes was significantly  
199 higher than that from the unprotected plants by 420–560 kg·ha<sup>-1</sup> (Table 6). The effectiveness of  
200 plant protection programmes depended on the environmental conditions that shaped the  
201 development of plants (Table 7). In the season 2011–2012, significantly higher yields were  
202 obtained on plots where plants were protected in autumn compared to the yields on control  
203 plots. The autumn treatment of plants with a fungicide with growth-regulating properties  
204 contributed to the limitation of plant losses during the winter which resulted in greater number  
205 of siliques per m<sup>2</sup> compared to unprotected plots in autumn. However, in the season 2013–  
206 2014, when plant development in the early stages was limited by the precipitation  
207 shortage before sowing and relatively low temperatures in September and the first  
208 decade of October (Table 2), significantly higher yields were obtained from the plots  
209 without the autumn treatment compared to the yields on the control plots. In the season  
210 2012–2013, all methods of protection against pathogens significantly prevented the loss of  
211 yield. The yield from the protected plots was significantly higher than the yield from the  
212 unprotected plots by 420–580 kg·ha<sup>-1</sup>. None of the remaining experimental factors—cultivars  
213 sown at different seeding rates and levels of nitrogen fertilisation—had influence on the yield-  
214 protecting effect of fungicide treatment (Table 5).

215 Table 3. Anova *F*-test statistics

| Effect                                                 | <i>S. sclerotiorum</i> | <i>Leptosphaeria</i> spp. | <i>B. fuckeliana</i>                                          | <i>Alternaria</i> spp. |
|--------------------------------------------------------|------------------------|---------------------------|---------------------------------------------------------------|------------------------|
|                                                        | Disease incidence (%)  |                           | Disease severity (% of disease-affected area of each silique) |                        |
| Growing season (Y)                                     | 203.75**               | 3.50*                     | 2.21*                                                         | 279.98**               |
| Protection programme (time of application) (A)         | 284.44**               | 11.91**                   | 2.85*                                                         | 25.37**                |
| Spring rate of N fertilizer (kg·ha <sup>-1</sup> ) (B) | 0.08 ns                | 0.22 ns                   | 0.00 ns                                                       | 2.24 ns                |
| Cultivars sown at different seeding rates (C)          | 3.69*                  | 6.09**                    | 1.14 ns                                                       | 1.16 ns                |
| YXA                                                    | 2.11 ns                | 2.16 ns                   | 1.96 ns                                                       | 2.45 ns                |
| YXB                                                    | 0.27 ns                | 0.54 ns                   | 0.43 ns                                                       | 0.11 ns                |
| YXC                                                    | 1.66 ns                | 1.83 ns                   | 1.96 ns                                                       | 1.45 ns                |
| AXB                                                    | 0.10 ns                | 0.68 ns                   | 0.10 ns                                                       | 1.82 ns                |
| AXC                                                    | 1.11 ns                | 1.09 ns                   | 1.02 ns                                                       | 1.14 ns                |
| BXC                                                    | 0.82 ns                | 0.77 ns                   | 0.90 ns                                                       | 0.34 ns                |
| YXAXB                                                  | 0.75 ns                | 0.70 ns                   | 0.53 ns                                                       | 0.59 ns                |
| YXAXBXC                                                | 1.05 ns                | 0.40 ns                   | 1.06 ns                                                       | 0.41 ns                |

216 ns-not significant

217 \*Significant P<0.05

218 \*\*Significant P<0.01

219

220

221

222

223

224 Table 4. Significance of differences between mean values of evaluated factors in evaluation of disease symptoms on plants caused by parhogens

225

| Factor/level                                       | <i>S. sclerotiorum</i> | <i>Leptosphaeria</i> spp. | <i>B. fuckeliana</i>                                          | <i>Alternaria</i> spp. |
|----------------------------------------------------|------------------------|---------------------------|---------------------------------------------------------------|------------------------|
|                                                    | Disease incidence (%)  |                           | Disease severity (% of disease-affected area of each silique) |                        |
| Growing season                                     |                        |                           |                                                               |                        |
| 2012                                               | 4.2 b <sup>1</sup>     | 14.0 a                    | 4.46 a                                                        | 13.9 a                 |
| 2013                                               | 8.0 b                  | 10.3 ab                   | 1.78 b                                                        | 3.2 b                  |
| 2014                                               | 6.1 ab                 | 7.6 b                     | 4.12 a                                                        | 4.1 b                  |
| Protection programme (time of application)         |                        |                           |                                                               |                        |
| BBCH 16 + BBCH 33 + BBCH 65                        | 1.9 b                  | 8.3 b                     | 3.01 b                                                        | 5.77 b                 |
| BBCH 16 + BBCH 33                                  | 4.0 b                  | 9.9 b                     | 3.10 b                                                        | 6.23 b                 |
| BBCH 33 + BBCH 65                                  | 2.3 b                  | 10.9 b                    | 3.14 b                                                        | 6.12 b                 |
| Control                                            | 28.6 a                 | 13.4 a                    | 4.56 a                                                        | 10.1 a                 |
| Spring rate of N fertilizer (kg·ha <sup>-1</sup> ) |                        |                           |                                                               |                        |
| 160                                                | 9.1 a                  | 10.8 a                    | 3.45 a                                                        | 6.8 a                  |
| 220                                                | 9.2 a                  | 10.5 a                    | 3.45 a                                                        | 7.4 a                  |
| Cultivars sown at different seeding rates          |                        |                           |                                                               |                        |
| Casoar 60                                          | 9.9 a                  | 8.4 b                     | 3.10 a                                                        | 6.9 a                  |
| Casoar 80                                          | 9.9 a                  | 10.3 ab                   | 3.83 a                                                        | 6.6 a                  |
| Visby 50                                           | 8.2 b                  | 11.4 ab                   | 3.29 a                                                        | 7.2 a                  |
| Visby 70                                           | 8.8 ab                 | 12.5 a                    | 3.61 a                                                        | 7.6 a                  |

226 <sup>1</sup> Means with the same letter are not significantly different at P<0.05 according to Tukey's HSD test

227

228

229

230

231

232 Table 5. Anova *F*-test statistics

| Effect                                                       | Seed yield<br>(Mg·ha <sup>-1</sup> ) | Plants ·m <sup>-2</sup> |                 | Overwintering (%) | Plants ·m <sup>-2</sup><br>before<br>harvest | Silique·plant <sup>-1</sup> | Silique·m <sup>-2</sup> | Seeds·silique <sup>-1</sup> | 1000 seed<br>weight (g) |
|--------------------------------------------------------------|--------------------------------------|-------------------------|-----------------|-------------------|----------------------------------------------|-----------------------------|-------------------------|-----------------------------|-------------------------|
|                                                              |                                      | before<br>winter        | after<br>winter |                   |                                              |                             |                         |                             |                         |
| Growing<br>season (Y)                                        | 650.03**                             | 25.94**                 | 84.5**          | 256.80**          | 90.90**                                      | 154.68**                    | 281.92**                | 9.71*                       | 23.36**                 |
| Protection<br>programme<br>(time of<br>application)<br>(A)   | 25.16**                              | 0.57 ns                 | 1.34ns          | 2.92*             | 1.58 ns                                      | 2.88 ns                     | 4.47*                   | 2.43 ns                     | 31.92**                 |
| Spring rate of<br>N fertilizer<br>(kg·ha <sup>-1</sup> ) (B) | 5.70**                               | 1.46 ns                 | 0.84 ns         | 0.00 ns           | 0.94 ns                                      | 0.54 ns                     | 4.50*                   | 0.01 ns                     | 1.76 ns                 |
| Cultivars<br>sown at<br>different<br>seeding rates<br>(C)    | 140.61**                             | 43.43**                 | 35.09**         | 71.27**           | 34.71**                                      | 7.73**                      | 11.26**                 | 161.51**                    | 138.96**                |
| YXA                                                          | 3.93**                               | 0.95 ns                 | 0.84 ns         | 4.64 **           | 0.76 ns                                      | 0.99 ns                     | 2.58*                   | 1.93 ns                     | 11.16**                 |
| YXB                                                          | 3.12*                                | 2.24 ns                 | 2.10 ns         | 0.03 ns           | 2.08 ns                                      | 1.16 ns                     | 0.43 ns                 | 1.01 ns                     | 0.99 ns                 |
| YXC                                                          | 37.35**                              | 3.09**                  | 55.67**         | 60.11**           | 48.63**                                      | 0.37 ns                     | 8.04 **                 | 0.26 ns                     | 0.74 ns                 |
| AXB                                                          | 1.07 ns                              | 0.36 ns                 | 0.76 ns         | 1.57 ns           | 0.80 ns                                      | 0.97 ns                     | 0.68 ns                 | 0.88 ns                     | 0.96 ns                 |
| AXC                                                          | 1.29 ns                              | 1.27 ns                 | 1.54 ns         | 1.85 ns           | 1.77 ns                                      | 0.28 ns                     | 1.73 ns                 | 0.88 ns                     | 0.52 ns                 |
| BXC                                                          | 0.59 ns                              | 0.67 ns                 | 1.53 ns         | 0.63 ns           | 2.05 ns                                      | 0.28 ns                     | 0.34 ns                 | 1.33 ns                     | 0.99 ns                 |
| YXAXB                                                        | 1.90 ns                              | 0.85 ns                 | 1.20 ns         | 2.61 ns           | 0.99 ns                                      | 1.42 ns                     | 0.91 ns                 | 0.75 ns                     | 0.82 ns                 |
| YXAXBXC                                                      | 0.60 ns                              | 1.09 ns                 | 1.19ns          | 1.01 ns           | 1.26 ns                                      | 0.25 ns                     | 0.91 ns                 | 1.24 ns                     | 2.09 ns                 |

233 ns-not significant

234 \*Significant P&lt;0.05

235 \*\*Significant P&lt;0.01

236 Table 6. Significance of differences between mean values of evaluated factors in evaluation of seed yield, plant overwintering and yield components

| Factor/level                                       | Seed yield (Mg·ha <sup>-1</sup> ) | Plants ·m <sup>-2</sup> |              | Overwintering (%) | Plants ·m <sup>-2</sup> before harvest | Silique·plant <sup>-1</sup> | Silique·m <sup>-2</sup> | Seeds·silique <sup>-1</sup> | 1000 seed weight (g) |
|----------------------------------------------------|-----------------------------------|-------------------------|--------------|-------------------|----------------------------------------|-----------------------------|-------------------------|-----------------------------|----------------------|
|                                                    |                                   | before winter           | after winter |                   |                                        |                             |                         |                             |                      |
| Growing season                                     |                                   |                         |              |                   |                                        |                             |                         |                             |                      |
| 2011/2012                                          | 1.82 c <sup>1</sup>               | 48.9 ab                 | 24.3 b       | 53.2 b            | 23.3 b                                 | 99 b                        | 2143 c                  | 21.4 b                      | 5.48 a               |
| 2012/2013                                          | 5.27 b                            | 57.2 a                  | 56.2 a       | 98.2 a            | 55.2 a                                 | 91 b                        | 4795 b                  | 22.1 a                      | 5.08 b               |
| 2013/2014                                          | 6.39 a                            | 30.2 b                  | 28.6 b       | 95.2 a            | 28.6 b                                 | 236 a                       | 6111 a                  | 22.7 ab                     | 5.31 ab              |
| Protection programme (time of application)         |                                   |                         |              |                   |                                        |                             |                         |                             |                      |
| BBCH 16 + BBCH 33 + BBCH 65                        | 4.63 a                            | 44.6 a                  | 36.2 a       | 83.4 a            | 36.1 a                                 | 144 a                       | 4448 a                  | 22.4 a                      | 5.29 a               |
| BBCH 16 + BBCH 33                                  | 4.73 a                            | 46.3 a                  | 39.3 a       | 84.2 a            | 37.6 a                                 | 131 a                       | 4408 a                  | 22.6 a                      | 5.36 a               |
| BBCH 33 + BBCH 65                                  | 4.59 a                            | 46.3 a                  | 35.5 a       | 79.7 b            | 34.5 a                                 | 155 a                       | 4547 a                  | 21.5 a                      | 5.34 a               |
| Control                                            | 4.17 b                            | 44.5 a                  | 35.5 a       | 81.4 b            | 34.7 a                                 | 136 a                       | 3995 b                  | 22.0 a                      | 5.17 b               |
| Spring rate of N fertilizer (kg·ha <sup>-1</sup> ) |                                   |                         |              |                   |                                        |                             |                         |                             |                      |
| 160                                                | 4.47 b                            | 44.8 a                  | 35.9 a       | 82.2 a            | 35.3 a                                 | 140 a                       | 4202 b                  | 22.1 a                      | 5.28 a               |
| 220                                                | 4.58 a                            | 46.0 a                  | 36.8 a       | 82.2 a            | 36.1 a                                 | 144 a                       | 4498 a                  | 22.1 a                      | 5.30 a               |
| Cultivars sown at different seeding rates          |                                   |                         |              |                   |                                        |                             |                         |                             |                      |
| Casoar 60                                          | 3.90 c                            | 42.9 b                  | 31.2 b       | 72.7 b            | 31.0 b                                 | 141 b                       | 3764 b                  | 18.6 b                      | 5.48 a               |
| Casoar 80                                          | 4.31 b                            | 55.1 a                  | 39.0 a       | 73.8 b            | 38.9 a                                 | 118 c                       | 3949 b                  | 19.0 b                      | 5.42 a               |
| Visby 50                                           | 4.76 a                            | 37.0 c                  | 33.5 b       | 91.5 a            | 32.0 b                                 | 166 a                       | 4409 a                  | 25.4 a                      | 5.14 b               |
| Visby 70                                           | 5.04 a                            | 46.7 b                  | 41.7 a       | 90.7 a            | 40.5 a                                 | 142 b                       | 4685 a                  | 25.3 a                      | 5.11 b               |

237 <sup>1</sup> Means with the same letter are not significantly different at P<0.05 according to Tukey's HSD

238  
239  
240

241 Tabela 7. Significance of differences between mean values of evaluated factors of growing season and protection programme in evaluation of seed  
 242 yield, plant overwintering and yield components

| Growing season | Protection programme (time of application) | Seed yield (Mg·ha <sup>-1</sup> ) | Plants ·m <sup>-2</sup> |              | Overwintering (%) | Plants ·m <sup>-2</sup> before harvest | Silique·plant <sup>-1</sup> | Silique·m <sup>-2</sup> | Seeds·silique <sup>-1</sup> | 1000 seed weight (g) |
|----------------|--------------------------------------------|-----------------------------------|-------------------------|--------------|-------------------|----------------------------------------|-----------------------------|-------------------------|-----------------------------|----------------------|
|                |                                            |                                   | before winter           | after winter |                   |                                        |                             |                         |                             |                      |
| 2011/2012      | BBCH 16 + BBCH 33 + BBCH 65                | 2.09 ab <sup>1</sup>              | 47.1 a                  | 25.3 a       | 59.3 a            | 26.1 a                                 | 105 a                       | 2415 a                  | 21.6 a                      | 5.39 a               |
|                | BBCH 16 + BBCH 33                          | 2.18 a                            | 49.0 a                  | 27.6 a       | 59.1 a            | 26.3 a                                 | 89 a                        | 2398 a                  | 22.1 a                      | 5.53 a               |
|                | BBCH 33 + BBCH 65                          | 1.74 bc                           | 52.8 a                  | 22.6 a       | 45.7 b            | 20.6 a                                 | 109 a                       | 1951 b                  | 21.0 a                      | 5.50 a               |
|                | Control                                    | 1.66 c                            | 46.9 a                  | 21.8 a       | 48.6 b            | 20.4 a                                 | 91 a                        | 1806 b                  | 20.9 a                      | 5.49 a               |
| 2012/2013      | BBCH 16 + BBCH 33 + BBCH 65                | 5.41 a                            | 56.2 a                  | 55.2 a       | 98.2 a            | 54.2 a                                 | 93 a                        | 4808 a                  | 21.5 a                      | 5.11 a               |
|                | BBCH 16 + BBCH 33                          | 5.47 a                            | 57.5 a                  | 56.5 a       | 98.2 a            | 55.5 a                                 | 93 a                        | 4861 a                  | 22.8 a                      | 5.15 a               |
|                | BBCH 33 + BBCH 65                          | 5.31 a                            | 55.9 a                  | 54.9 a       | 98.1 a            | 53.9 a                                 | 93 a                        | 4872 a                  | 22.3 a                      | 5.12 a               |
|                | Control                                    | 4.89 b                            | 59.1 a                  | 58.1 a       | 98.1 a            | 57.1 a                                 | 84 a                        | 4639 a                  | 22.0 a                      | 4.96 a               |
| 2013/2014      | BBCH 16 + BBCH 33 + BBCH 65                | 6.37 ab                           | 30.4 a                  | 28.1 a       | 92.9 a            | 28.1 a                                 | 235 a                       | 6123 b                  | 23.9 a                      | 5.35 a               |
|                | BBCH 16 + BBCH 33                          | 6.54 ab                           | 32.4 a                  | 30.9 a       | 95.4 a            | 30.9 a                                 | 212 a                       | 5963 b                  | 22.9 a                      | 5.41 a               |
|                | BBCH 33 + BBCH 65                          | 6.72 a                            | 30.2 a                  | 28.9 a       | 95.2 a            | 28.9 a                                 | 262 a                       | 6818 a                  | 21.1 a                      | 5.41 a               |
|                | Control                                    | 5.95 b                            | 27.6 a                  | 26.6 a       | 97.3 a            | 26.6 a                                 | 234 a                       | 5541 c                  | 23.0 a                      | 5.06 b               |

243 <sup>1</sup> Means with the same letter are not significantly different at P<0.05 according to Tukey's HSD

## 244 **Rate of nitrogen fertilisation**

245 The increase in the level of nitrogen fertiliser from 160 to 220 kg·ha<sup>-1</sup> caused a significant  
 246 increase in the average seed yield (Table 6). The effectiveness of nitrogen fertilisation varied  
 247 during the years of the study. The nitrogen fertilisation significantly increased the seed yield in  
 248 the second and the third season (2012–2013 and 2013–2014) (Table 8). The effectiveness of  
 249 nitrogen fertilisation was not influenced neither by cultivars sown at different seeding rates nor  
 250 by fungicide treatment (Table 5). The higher yield obtained with 220 kg N·ha<sup>-1</sup> can be attributed  
 251 to the higher number of siliques per unit area (Table 6). The number of siliques per unit area  
 252 was the only yield component that significantly increased with an increase in the rate of nitrogen  
 253 fertilisation (220 kg·ha<sup>-1</sup>). Similar to the yield, this parameter also significantly increased with  
 254 the increase in the rate of nitrogen fertilisation in the second and the third experimental cycle  
 255 (2012–2013 and 2013–2014) (Table 8).

256 Table 8. Significance of differences between mean values of evaluated factors of growing  
 257 season and spring nitrogen fertilization in evaluation of seed yield, plant overwintering and  
 258 yield components

| Growing season | Spring rate of N fertilizer (kg·ha <sup>-1</sup> ) | Seed yield (Mg·ha <sup>-1</sup> ) | Plants m <sup>-2</sup> |              | Overwintering (%) | Plants m <sup>-2</sup> before harvest | Silique plant <sup>-1</sup> | Silique m <sup>-2</sup> | Seeds siique <sup>-1</sup> | 1000 seed weight (g) |
|----------------|----------------------------------------------------|-----------------------------------|------------------------|--------------|-------------------|---------------------------------------|-----------------------------|-------------------------|----------------------------|----------------------|
|                |                                                    |                                   | before winter          | after winter |                   |                                       |                             |                         |                            |                      |
| 2011/2012      | 160                                                | 1.93 a <sup>1</sup>               | 46.9 a                 | 22.7 a       | 53.0 a            | 21.8 a                                | 100 a                       | 2060 a                  | 21.6 a                     | 5.47 a               |
|                | 220                                                | 1.90 a                            | 51.0 a                 | 25.9 a       | 53.4 a            | 24.9 a                                | 96 a                        | 2225 a                  | 21.2 a                     | 5.48 a               |
| 2012/2013      | 160                                                | 5.15 b                            | 57.6 a                 | 56.6 a       | 98.2 a            | 55.6 a                                | 84 a                        | 4533 b                  | 22.2 a                     | 5.08 a               |
|                | 220                                                | 5.39 a                            | 56.8 a                 | 55.8 a       | 98.1 a            | 54.8 a                                | 98 a                        | 5057 a                  | 22.1 a                     | 5.08 a               |
| 2013/2014      | 160                                                | 6.34 b                            | 30.0 a                 | 28.6 a       | 95.3 a            | 28.6 a                                | 235 a                       | 6012 b                  | 22.4 a                     | 5.28 a               |
|                | 220                                                | 6.45 a                            | 30.3 a                 | 28.7 a       | 95.1 a            | 28.7 a                                | 237 a                       | 6210 a                  | 23.1 a                     | 5.34 a               |

259 <sup>1</sup> Means with the same letter are not significantly different at P<0.05 according to Tukey's HSD

## 260 **Cultivars sown at different seeding rates**

261 The average yield in the 3-year experiment ranged from 1.82 to 6.39 Mg·ha<sup>-1</sup> (Table 6). The  
 262 highest seed yield was observed in the season with favourable wintering and water conditions  
 263 for the stages of flowering and fruit growth (2013–2014), whereas the lowest yield was noticed  
 264 in the year with the least favourable conditions for dormancy (2011–2012). Regardless of the  
 265 seeding rate, the hybrid cultivar Visby showed the highest average yields (5.04 Mg·ha<sup>-1</sup> at 70  
 266 seeds·m<sup>-2</sup> and 4.76 Mg·ha<sup>-1</sup> at 50 seeds·m<sup>-2</sup>) in the study. The average yield of the open-



267 pollinated cultivar Casoar was more dependent on the seeding rate; a higher yield ( $4.31 \text{ Mg}\cdot\text{ha}^{-1}$ )  
268 was obtained at the higher seeding rate ( $80 \text{ seeds}\cdot\text{m}^{-2}$ ), whereas lowering the seeding rate to 60  
269  $\text{seeds}\cdot\text{m}^{-2}$  resulted in a yield decrease by  $410 \text{ kg}\cdot\text{ha}^{-1}$ . The effect of seeding rate on the yield of  
270 the assessed cultivars was dependant on the weather conditions during the seasons in which the  
271 experiment was conducted (Table 9). In the least favourable conditions for plant development  
272 (2011–2012), significant differences in the yields were noted in Visby cultivar sown at different  
273 seeding rates ( $2.87 \text{ Mg}\cdot\text{ha}^{-1}$  at  $70 \text{ seeds}\cdot\text{m}^{-2}$  and  $2.29 \text{ Mg}\cdot\text{ha}^{-1}$  at  $50 \text{ seeds}\cdot\text{m}^{-2}$ ). However, in the  
274 most favourable conditions (2013–2014), significant differences were observed in the yields of  
275 Casoar cultivar ( $6.54 \text{ Mg}\cdot\text{ha}^{-1}$  at  $80 \text{ seeds}\cdot\text{m}^{-2}$  and  $5.82 \text{ Mg}\cdot\text{ha}^{-1}$  at  $60 \text{ seeds}\cdot\text{m}^{-2}$ ). Moreover, in  
276 these conditions, and also in the conditions of the 2012–2013 season, the yields of Casoar  
277 cultivar from the plots sown at a higher seeding rate ( $80 \text{ seeds}\cdot\text{m}^{-2}$ ) did not differ significantly  
278 from the yields of Visby cultivar from the plots sown at 50 and  $70 \text{ seeds}\cdot\text{m}^{-2}$ .

279 Higher yields of Visby cultivar can be attributed to the higher number of seeds per silique and  
280 higher number of siliques per  $\text{m}^2$  resulting from the higher number of plants per  $\text{m}^2$  before  
281 harvest despite the lower seeding rate of  $10 \text{ seeds}\cdot\text{m}^{-2}$  and the greater compensation ability  
282 expressed by the greater number of siliques per plant (Table 6). Average higher number of  
283 Visby cultivar plants before harvest observed with the lowest seeding rate resulted from the  
284 greater overwintering success of this cultivar in the season with the worst conditions of  
285 dormancy. In turn, the higher number of siliques per plant of Visby cultivar was a result of the  
286 higher plant height. On average, a Visby cultivar plant was taller than a Casoar cultivar plant  
287 by 15 cm (data not shown). Irrespective of the cultivar, an increase in seeding rate (Visby: 50–  
288  $70 \text{ pure live seeds}\cdot\text{m}^{-2}$ ; Casoar:  $60\text{--}80 \text{ pure live seeds}\cdot\text{m}^{-2}$ ) decreased the number of siliques per  
289 plant and the weight of 1000 seeds. However, significant differences were recorded between  
290 the cultivars only in the number of siliques per plant.

291 Table 9. Significance of differences between mean values of evaluated factors of growing season and cultivar sown in seeding rate in evaluation  
 292 of seed yield, plant overwintering and yield components

| Growing season | Cultivars sown at different seeding rates | Seed yield (Mg·ha <sup>-1</sup> ) | Plants ·m <sup>-2</sup> |              | Overwintering (%) | Plants ·m <sup>-2</sup> before harvest | Silique·plant <sup>-1</sup> | Silique·m <sup>-2</sup> | Seeds·silique <sup>-1</sup> | 1000 seed weight (g) |
|----------------|-------------------------------------------|-----------------------------------|-------------------------|--------------|-------------------|----------------------------------------|-----------------------------|-------------------------|-----------------------------|----------------------|
|                |                                           |                                   | before winter           | after winter |                   |                                        |                             |                         |                             |                      |
| 2012           | Casoar 60                                 | 1.20 c <sup>1</sup>               | 42.9 b                  | 12.0 b       | 29.3 b            | 12.3 b                                 | 101 a                       | 1034 b                  | 18.9 b                      | 5.69 a               |
|                | Casoar 80                                 | 1.02 c                            | 59.8 a                  | 14.0 b       | 26.8 b            | 14.6 b                                 | 76 a                        | 1148 b                  | 18.7 b                      | 5.62 a               |
|                | Visby 50                                  | 2.29 b                            | 40.9 b                  | 32.3 a       | 81.1 a            | 30.1 a                                 | 113 a                       | 3296 a                  | 23.9 a                      | 5.31 b               |
|                | Visby 70                                  | 2.87 a                            | 52.3 ab                 | 38.9 a       | 75.7 a            | 36.3 a                                 | 92 a                        | 3082 a                  | 24.0 a                      | 5.27 b               |
| 2013           | Casoar 60                                 | 4.87 b                            | 53.3 b                  | 52.2 bc      | 98.0 a            | 51.2 bc                                | 92 a                        | 4483 a                  | 18.7 b                      | 5.25 a               |
|                | Casoar 80                                 | 5.20 ab                           | 69.5 a                  | 68.4 a       | 98.5 a            | 67.5 a                                 | 69 a                        | 4581 a                  | 19.7 b                      | 5.22 a               |
|                | Visby 50                                  | 5.48 a                            | 47.4 b                  | 46.4 c       | 97.9 a            | 45.4 c                                 | 110 a                       | 4971 a                  | 25.4 a                      | 4.94 b               |
|                | Visby 70                                  | 5.53 a                            | 58.6 ab                 | 57.6 b       | 98.2 a            | 56.6 b                                 | 95 a                        | 5146 a                  | 24.9 a                      | 4.92 b               |
| 2014           | Casoar 60                                 | 5.82 b                            | 32.6 ab                 | 29.4 ab      | 90.8 a            | 29.4 ab                                | 231 a                       | 5998 a                  | 18.3 b                      | 5.49 a               |
|                | Casoar 80                                 | 6.54 a                            | 36.1 a                  | 34.7 a       | 96.2 a            | 34.7 a                                 | 205 a                       | 6385 a                  | 18.6 b                      | 5.43 a               |
|                | Visby 50                                  | 6.50 a                            | 22.7 b                  | 21.7 b       | 95.6 a            | 21.7 b                                 | 270 a                       | 5419 a                  | 26.9 a                      | 5.17 b               |
|                | Visby 70                                  | 6.72 a                            | 29.3 ab                 | 28.6 ab      | 98.2 a            | 28.6 ab                                | 235 a                       | 6642 a                  | 27.2 a                      | 5.15 b               |

293 <sup>1</sup> Means with the same letter are not significantly different at P<0.05 according to Tukey's HSD

## 294 **Discussion**

### 295 **Disease control**

296 The winter oilseed rape is exposed to disease infections throughout the growing season. The  
297 loss of yields is caused, on the one hand, by infection depending on the genetically controlled  
298 resistance of cultivars [38] and the effectiveness of protection from pathogens, and on the other  
299 hand, by the incidence of pathogens that cause the most dangerous diseases in this species, such  
300 as blackleg (*P. lingam*, syn. *Leptosphaeria maculans*), stem rot (*S. sclerotiorum*), light leaf spot  
301 (*Cylindrosporium concentricum*, syn. *Pyrenopeziza brassicae*), verticillium wilt (*Verticillium*  
302 *dahliae*), dark pod spot (*Alternaria brassicae*), downy mildew (*Peronospora parasitica*), grey  
303 mould (*B. cinerea*), and clubroot disease (*Plasmodiophora brassicae*) [31, 42, 48], triggered by  
304 the environmental and agrotechnical conditions. The conducted experiment showed that the  
305 applied fungicides limited the yield losses resulting from pathogen infection and unfavourable  
306 wintering conditions (Table 4, 6, 7). The presented results thus broaden the view of Kruse and  
307 Verreet [21] that the increase in yield due to fungicides treatment is a result of not only the  
308 inhibition of infection by pathogens but also the action of fungicides as a growth regulator,  
309 which contributes to shortening the main shoot, reducing plant lodging, and increasing the  
310 resistance of siliques to cracking. In the season 2011–2012 characterised by severe and  
311 snowless winter, the use of chemical fungicide with growth-regulating properties at the six-leaf  
312 phase (BBCH 16) allowed limiting the loss of plants during winter dormancy and thereby  
313 resulting in higher crop yields from the protected plots in autumn (Tbla 7). This result is also  
314 confirmed by the previous studies of Geisler [11], Paul [27], and Schulz [34], which showed an  
315 increase in the winter hardiness of winter oilseed rape as a result of shortening the plant growth  
316 with the use of growth regulators. However, in the season 2013–2014, autumn treatment was  
317 not very effective (Table 7). The winter was mild (Table 2), and the treatment at the six-leaf  
318 stage of winter oilseed rape plants that were poorly developed due to unfavourable weather

319 conditions did not significantly reduce the yield losses (Table 7). During this season,  
320 significantly higher yields were obtained with spring treatment, compared to the yields  
321 collected from control plots. Although the effectiveness of all the applied protective methods  
322 was significant only in the 2012–2013 season, it is worth emphasising that during the  
323 experiment period, the lowest yields were always obtained from the unprotected plots. This  
324 indicates the effectiveness of the chemical protection programme used in the experiment in  
325 reducing plant infection. The programme that included treatment at the full flowering stage  
326 (BBCH 65) was the most effective in reducing the symptoms of stem rot (*S. sclerotiorum*) and  
327 dark pod spot (*A. brassicae*) (Table 5). The effectiveness of the treatment in the phase of full  
328 flowering was also confirmed by Jankowski et al. [17] and Kruse and Verreet [21]. In turn, the  
329 combination of the autumn and early-spring treatments was the most effective in limiting the  
330 disease symptoms caused by *P. lingam*, syn. *L. maculans* (Table 5). Similar results were also  
331 reported by Kruse and Verreet [21]. Moreover, the experiment did not show any differences in  
332 yield between the cultivars as a result of intensification of protection, confirming the earlier  
333 reports of Jajor et al. [15], Jędryczka and Kaczmarek [18], and Wójtowicz [48] and thus  
334 indirectly indicating the need to include a chemical protection programme in the cultivation of  
335 winter oilseed rape.

336

### 337 **Rate of nitrogen fertilisation**

338 Spring nitrogen fertilisation is considered to be one of the most important factors of production  
339 [4, 31]. In many experiments, yield increase has been achieved within the dose limits of 150–  
340 180 kg N·ha<sup>-1</sup> [3, 4, 35], and therefore, high (about 240 kg) [46, 50] and very high doses of  
341 nitrogen fertilisation (about 300 kg) [36] are rarely required. Determination of the optimal  
342 nitrogen dose is hampered by the strong dependence of fertilisation efficiency on the changing  
343 weather conditions in the years. In the present work, the increase in the level of fertilisation

344 from 160 to 220 kg·ha<sup>-1</sup> proved to be effective in the second and third growing seasons (2012–  
345 2013, 2013–2014). However, in the first season (2011/2012), in the conditions of severe and  
346 snowless winter and shortage of rainfall during spring development (Table 2), the increase in  
347 the level of fertilisation was ineffective (Table 8). The obtained results correspond with the  
348 results presented by Jankowski et al. [17], which also showed the variability of fertilisation  
349 efficiency in the years of investigations, when in one season there was a significant increase in  
350 the yield at a dose of 240 kg·ha<sup>-1</sup>, and in another at a dose of 180 kg·ha<sup>-1</sup>. The present research  
351 (Table 5) also confirms the results of studies describing a similar response of cultivars to  
352 nitrogen fertilisation [8, 17], despite their diverse ability to take up and use nitrogen [19, 44].  
353 Therefore, unequal nitrogen uptake and utilisation abilities are usually not significant enough  
354 to contribute to a significant difference in crop yield that can result from the varied level of  
355 nitrogen fertilisation in the range of doses recommended for agricultural practice. An indirect  
356 confirmation of the above statement is the small number of scientific reports showing a  
357 significantly different response of cultivars to nitrogen fertilisation. However Wielebski and  
358 Wójtowicz [43] showed a significantly lower dependence of the yield level on the level of  
359 nitrogen fertilisation of the first hybrid cultivar Synergy in comparison with population  
360 cultivars. A similar tendency was confirmed by the research of Pellet [28], except that no  
361 statistically significant differences were shown by the results. The results of the present study  
362 (Table 4) are also in line with the results presented by Sadowski et al.[33] and Lemańczyk et  
363 al. [23], which showed that the increase in nitrogen fertilisation did not increase the severity of  
364 disease symptoms caused by *S. sclerotiorum* and *Leptosphaeria* ssp. The lack of a negative  
365 impact of increased nitrogen fertilisation on the infection of plants by the most dangerous  
366 pathogens of oilseed rape is desirable from the point of view of production intensification.

367

## 368 **Cultivars sown at different seeding rates**

369 The yield level is an indicator of a plant's development which depends on its response to  
370 environmental and agrotechnical conditions. The plant response is in turn mainly conditioned  
371 by the impact of environmental and agrotechnical factors and its adaptability to adverse  
372 conditions. In the unfavourable seasons, yields are significantly determined by the plant  
373 resistance to stress. Compared to the Casoar cultivar, over 1-tonne higher yield was recorded  
374 for the Visby cultivar in the 2011–2012 season (Table 9), characterised by severe and snowless  
375 winter (Table 2), due to the greater winter hardiness and consequently the better wintering of  
376 this cultivar, which resulted in a much greater number of siliques per unit area (by more than  
377 1000 per m<sup>2</sup>). In the conditions of severe and snowless winter and shortage of rainfall during  
378 spring development in the season 2011–2012, the yield of the Visby cultivar was influenced  
379 mainly by the derivative of the sowing rate—the number of plants per unit area—as evidenced  
380 by the higher yields (over 0.5 tonne) collected from the plants sown densely at 70 seeds·m<sup>-2</sup>  
381 (Table 9). In the season 2013–2014 characterised by a shortage of rainfall during emergence  
382 and good moisture content in spring, the amount of seeds sown determined the yields of the  
383 Casoar cultivar which showed a significant difference. Significantly higher yields were  
384 collected from the Casoar cultivar plants sown more densely at 80 seeds·m<sup>-2</sup>. The lack of a  
385 significant variation in the yield of the hybrid cultivar in this season indicates that due to its  
386 greater vigour it was able to better utilise the favourable humidity conditions recorded in spring  
387 2014. In the remaining growing seasons, the variation in the yield level between the plots sown  
388 at different rates was statistically insignificant. Nevertheless, in the case of both hybrid and  
389 open-pollinated cultivars, higher yields were collected from the plants sown more densely.  
390 These results are consistent with the study by Jankowski et al. [17], which assessed the impact  
391 of the seeding rate (80, 60, and 40 seeds·m<sup>-2</sup>) of hybrid cultivars on their yield and showed that  
392 the highest yields were obtained from densely sown plants (80 seeds·m<sup>-2</sup>). Similar results are

393 found in the work of Wójtowicz et al. [49], which revealed a significant reduction in the yield  
394 of the hybrid cultivar when the amount of seeds sown was reduced from 70 to 35 seeds·m<sup>-2</sup>.  
395 Experiments showed that in the conditions of Wielkopolska higher yields were obtained at  
396 higher seeding rates as a consequence of the unfavourable humidity conditions during  
397 emergence and thermal conditions during the winter dormancy period resulting in a reduction  
398 in the number of plants per unit area and the late beginning of vegetation and shortage of  
399 precipitation in the spring limiting the production of siliques. This broadens the view presented  
400 by Jankowski and Budzyński [16] about the influence of thermal conditions during winter and  
401 humidity in spring on the yields from plots sown at varied seeding rates. The humidity  
402 conditions during emergence also play an equally important role and can significantly adversely  
403 affect the number of plants per unit area. Earlier results of Wójtowicz et al. [49] proved that  
404 adverse conditions causing a decrease in plant density can occur with high probability during  
405 plant emergence.

406 In the three years of experiment (2009–2011) conducted in Wielkopolska region, unfavourable  
407 conditions during early autumn development, which contributed to a reduction in the number  
408 of plants in relation to the amount of seeds sown by about 40%, were recorded in two growing  
409 seasons (2009–2010 and 2010–2011). From the presented results (Table 5), the lack of a  
410 significant interaction between the amount of seeds sown for the evaluated cultivars and the  
411 applied levels of nitrogen fertilisation is also worth noting. The above dependence suggests that  
412 in the experimental conditions higher plant density did not limit plant development. These  
413 results are consistent with those of Budzyński [4], who in intensive technologies for excessive  
414 compaction for hybrid cultivars in spring recognised 60 plants·m<sup>-2</sup>. Despite the documented  
415 possibility of reducing the amount of seeds sown to 20–40 pure live seeds·m<sup>-2</sup> [20, 22, 40], the  
416 presented results force taking into account the humidity conditions when determining the  
417 seeding rate, especially in the areas characterised by higher probability of precipitation

418 shortage. In addition, the results lead to a hypothesis that under the conditions of predicted  
419 global warming, which will result in greater weather variability, the role of the amount of seeds  
420 sown, a basic element of rapeseed agrotechnology, in yielding will increase. Another factor that  
421 will be of more importance in the future is the selection of cultivar for cultivation. Furthermore,  
422 the more frequent occurrence of unfavourable conditions for the development of crop plants  
423 will require looking for stable-yielding cultivars.

424

## 425 **Conclusion**

426 The conducted experiment showed that all the analysed factors had a significant impact on the  
427 yield level. The applied fungicides limited the crop losses resulting from pathogen infection  
428 and unfavourable wintering conditions. The protection programme consisting of treatment at  
429 the BBCH 65 flowering stage most effectively reduced the damage caused by stem rot (*S.*  
430 *sclerotiorum*) and dark pod spot (*A. brassicae*). In turn, the protection programme combining  
431 the autumn and early-spring treatments most effectively limited the infection caused by *P.*  
432 *lingam*, syn. *L. maculans*. In addition, the effectiveness of nitrogen fertilisation varied during  
433 the years of the study. In the conditions of shortage of precipitation during spring development  
434 after a period of stress caused by severe and snowless winter, the increase in the rate of  
435 fertilisation up to 220 kg·ha<sup>-1</sup> was ineffective. In less stressful conditions, nitrogen fertilisation  
436 exerted a yield-increasing effect up to a rate of 220 kg·ha<sup>-1</sup>. Increase in nitrogen fertilisation  
437 level also did not increase the severity of disease symptoms caused by *S. sclerotiorum* and  
438 *Leptosphaeria* ssp. This lack of a negative impact of increased nitrogen fertilisation on plant  
439 infection by the most dangerous rape pathogens is desirable from the point of view of  
440 production intensification. The yield of seeds depended both on the yield potential of the  
441 cultivar and its ability to develop under stressful conditions. The experiment has shown a  
442 greater resistance of the restored hybrid cultivar Visby to the adverse thermal conditions. Good



443 winter hardiness allowed obtaining relatively high yields of this cultivar in the conditions of  
444 severe and snowless winter. Moreover, due to its greater vigour than Casoar cultivar, Visby  
445 cultivar was able to better utilise the favourable humidity conditions that were recorded in  
446 spring 2014, and regardless of the amount of seeds sown, its yield was high. By contrast, the  
447 yields of Casoar were more dependent on the amount of seeds sown. Nevertheless, both  
448 cultivars yielded higher at a higher sowing rate. They also responded similarly to plant  
449 protection programmes and the rate of nitrogen fertilisation in spring.

450

## 451 **References**

- 452 1. Ackman, R.G., 1990. Canola fatty acids—an ideal mixture for health, nutrition and food  
453 use. In: F. Shahidi (Ed.), *Canola and Rapeseed: Production Chemistry, Nutrition and*  
454 *Processing Technology*, Van Nostrand Reinhold, New York, US. 1990. pp. 81-98.
- 455 2. Ahmad G., Jan A., Arif M., Jan M.T., Shah H. 2011. Effect of nitrogen and sulfur  
456 fertilization on yield components, seed and oil yields of canola. *J. Plant Nutr.* 2011. 34:  
457 2069-2082.
- 458 3. Barłóg P., Grzebisz W. Effect of timing and nitrogen fertilizer application on winter oilseed  
459 rape (*Brassica napus* L.). I. Growth dynamics and seed yield. *J. Agron. Crop Sci.* 2004. 190:  
460 305-313.
- 461 4. Budzyński W. Rapeseed (in Polish) in: Budzyński W., Zajac T. (Eds.), *Oilseed Crops:*  
462 *Cultivation and Use*, PWRiL Poznań, Poland. 2010. pp. 15-107.
- 463 5. Budzyński W., Ojczyk T. Rape. Production of oilseed oil (in Polish). University of  
464 Agriculture and Technology Olsztyn. 1996.
- 465 6. Diepenbrock W. 2000. Yield analysis of winter oilseed rape (*Brassica napus* L.): a review.  
466 *Field Crops Res.* 2000. 67: 35-49.
- 467 7. FAOSTAT, 2017. Faostat Agriculture data. <http://www.fao.org/faostat/en/#data>
- 468 8. Friedt W., Lühs W., Müller M., Ordon F. Utility of Winter Oilseed Rape (*Brassica napus*  
469 L.) Cultivars and New Breeding Lines for Low-input Cropping Systems.  
470 *Pflanzenbauwissenschaften.* 2003. 7 (2), S. 49–55, 2003, ISSN 1431-8857, © Verlag Eugen  
471 Ulmer GmbH & Co., Stuttgart.

- 472 9. Friedt W., Snowdon R.. Oilseed rape. In: J. Vollmann, I. Rajcan (Eds.), Oil Crops, Springer  
473 Science, New York, US. 2009. pp. 91-126.
- 474 10. Gaile Z., Balodis O., Bankina B. Advances of Fungicide Application for Winter Oilseed  
475 Rape, Fungicides, Odile Carisse (Ed.), 2010. ISBN: 978-953-307-266-1, In: Tech,  
476 Available from: [http://www.intechopen.com/articles/show/title/advances-of-fungicide-](http://www.intechopen.com/articles/show/title/advances-of-fungicide-application-for-winter-oilseed-rape-)  
477 [application-for-winter-oilseed-rape-](http://www.intechopen.com/articles/show/title/advances-of-fungicide-application-for-winter-oilseed-rape-)
- 478 11. Geisler, G. Pflanzenbau. Ein Lehrbuch. 2. Auflage Verlag Paul Parey, Berlin und Hamburg.  
479 1988.
- 480 12. Gladders, P., Symonds B. V., Hardwick N. V., Sansford C. E.: Opportunities to control  
481 canker (*Leptosphaeria maculans*) in winter oilseed rape by improved spray timing. – Intern.  
482 Organiz. Biolog. Contr. Bull. 1998. 21: 111–120,
- 483 13. Jajor E., Wójtowicz M., Pieczul K. Influence of weather conditions and date of fungicydal  
484 control on occurrence of *Alternaria* spp. on oilseed rape (in Polish). Prog. Plant Protection/  
485 Post. Ochr. Roślin. 2008. 48 (3): 1048-1054.
- 486 14. Jajor E., Korbas M., Horoszkiewicz-Janka J., Wójtowicz M. Influence of weather  
487 conditions and date of fungicydal protection on the occurrence of *Sclerotinia sclerotiorum*  
488 on oilseed rape (in Polish). Prog. Plant Prot./Post. Ochr. Roślin. 2010. 50 (3): 1334-1339.
- 489 15. Jajor, E., Horoszkiewicz-Janka J., Danielewicz J., Korbas M. Influence of crop rotation and  
490 fungicides on occurrence limitation of winter oilseed rape diseases (in Polish). Prog. Plant  
491 Prot./Post. Ochr. Roślin. 2012. 52, pp. 1005-1010.
- 492 16. Jankowski K., Budzyński W. Response of different breeding forms of winter oilseed rape  
493 to date and density of sowing II. Seed yield and yield components (in Polish). Rośliny  
494 Oleiste Oilseed Crops, XXVIII. 2007. pp. 195-208.
- 495 17. Jankowski K., Budzyński W., Załuski D., Hulanicji P.S., Dubis B. Using a fractional  
496 factorial design to evaluate the effect of the intensity of agronomic practices on the yield of  
497 different winter oilseed rape morphotypes. Field Crops Research. 2016. 188, 50-61.  
498 <http://dx.doi.org/10.1016/j.fcr.2016.01.007>
- 499 18. Jędryczka M., Kaczmarek J. Efficiency of selected fungicides in protection against stem  
500 canker of brassicas in optimal and late spray time (in Polish). Prog. Plant Prot./Post. Ochr.  
501 Roślin. 2011. 51, pp. 1639-1643.
- 502 19. Kessel B., Schierholt A., Becker H.C. Nitrogen use efficiency in a genetically diverse set  
503 of winter oilseed rape (*Brassica napus* L.). Crop Sci. 2012. 52, pp. 2546-2554.
- 504 20. Krček V., Baranyk P., Pulkrabek J., Urban J., Skerikova M., Brant V., Zabransky Z.  
505 Influence of crop management on winter oilseed rape yield formation – evaluation of first

- 506 year of experiment. Proc. Conference MendelNet, 19–20 Nov 2014, Brno, Czech.  
507 2014.(accessed 27.05.15.)  
508 [http://web2.mendelu.cz/af\\_291\\_mendelnet/mendelnet2014/articles/50\\_krcek\\_1069.pdf](http://web2.mendelu.cz/af_291_mendelnet/mendelnet2014/articles/50_krcek_1069.pdf)
- 509 21. Kruse T., Verreet J.A. Epidemiological studies on winter oilseed rape *Brassica napus* L.  
510 var. *napus* infected by *Phoma lingam* (Teleomorph. *Leptosphaeria maculans*) and the  
511 effects of different fungicide applications with Folicur R (tebuconazole). *J. Plant Dis. Prot.*  
512 2005. 112, pp. 17-41.
- 513 22. Kwiatkowski C.A. Response of winter rape (*Brassica napus* L. ssp. *oleifera* Metzg.: Sinsk)  
514 to foliar fertilization and different seeding rates. *Acta Agrobot.* 2012. 6,5 pp. 161-170.
- 515 23. Lemanczyk, G., Jankowski K., Sadowski C., Klepin J., Muchalski T. Effect of  
516 differentiated nitrogen fertilization and desistance from pest control on the health status of  
517 rapeseed (in Polish). *Rośliny Oleiste Oilseed Crops*, XVIII. 1997. (2): 371–379.
- 518 24. Malhi S.S., Brandt S., Ulrich D., Lafond G.P., Johnston A.M., Zentner R.P. Comparative  
519 nitrogen response and economic evaluation for optimum yield of hybrid and open-  
520 pollinated canola. *Can. J. Plant Sci.* 2007. 87, pp. 449-460.
- 521 25. Nosenko T., Kot T., Kichshenko V. Rape seeds as a source of feed and food proteins. *Pol.*  
522 *J. Food Nutr. Sci.* 2014. 64, pp. 109-114.
- 523 26. Ozturk H. H. Energy Analysis for Biodiesel Production from RapeseedOil Energy  
524 Exploration & Exploitation. 2014. 32, (6) pp. 1005–1031.
- 525 27. Paul, V.H. Hinweise zur Bestandesführung des Raps im Herbst 1996. *Raps.* 1966. 14, 162-  
526 163.
- 527 28. Pellet D. Oilseed rape varietal response to nitrogen fertilization GCIRC Bulletin 18, 2002.
- 528 29. Penaud, A., Bernard C., Maisonneuve C., Pérčs A., Pilorgé E. Decision rules for a chemical  
529 control of *Leptosphaeria maculans*. Proc. of the 10th Intern. Rapeseed Congress, 26-29  
530 September, Canberra, Australia. 1999. available from  
531 <http://www.regional.org.au/au/gcirc/index.htm>
- 532 30. Rathke G.-W., Christen O., Diepenbrock W. Effects of nitrogen source and rate on  
533 productivity and quality of winter oilseed rape (*Brassica napus* L.) grown in different crop  
534 rotations. *Field Crops Res.* 2005. 94, pp. 103-113
- 535 31. Rathke G.-W., Behrens T., Diepenbrock W. Integrated nitrogen management strategies to  
536 improve seed yield, oil content and nitrogen efficiency of winter oilseed rape (*Brassica*  
537 *napus* L.): a review. *Agric. Ecosyst. Environ.* 2006. 117, pp. 80-108.
- 538 32. Rynek rzepaku nr 52 IERiGŻ-PIB 2018.

- 539 33. Sadowski, C., Musnicki C., Lemanczyk G., Drozdowska L. Effect of different nitrogen  
540 fertilization and absence of pest control on health status of rapeseed. Integrated control in  
541 oilseed crops. – Proceedings of a meeting held at Poznan, Poland. Bull. OILB/SROP 21,  
542 221–226, 1998.
- 543 34. Schulz,R.-R. Möglichkeiten zur Vermeidung einer vorzeitigen Sproßstreckung. Raps.  
544 1998. 16, 98-101
- 545 35. Schuster C., Rathke G.-W., et al. Nitrogen fertilization of transgenic winter oilseed rape.  
546 In: Horst, W.J. (Ed.), Plant Nutrition: Food Security and Sustainability of Agro-ecosystems  
547 Through Basic and Applied Research, Kluwer Academic Publishers, Dordrecht. 2001. pp.  
548 336-337.
- 549 36. Shepherd M.A., Sylvester-Bradley R. Effect of nitrogen fertilizer applied to winter oilseed  
550 rape (*Brassica napus* L.) on soil mineral nitrogen after harvest and on the response of a  
551 succeeding crop of winter wheat to nitrogen fertilizer. J. Agric. Sci. Camb. 1996. 126, pp.  
552 63-74.
- 553 37. Sochting H.P., Verreet J.A. Effects of different cultivation systems (soil management:  
554 nitrogen fertilization) on the epidemics of fungal diseases in oilseed rape (*Brassica napus*  
555 L. var. *napus*). J. Plant Dis. Prot. 2004. 111, pp. 1-29
- 556 38. Starzyka E., Starzyki M., Kauzik M., Woś H., Cichy H., Budzianowski G.. Evaluation of  
557 winter rape resistance to *Leptosphaeria* spp. and *Sclerotinia sclerotiorum* (Lib.) de Bary in trials  
558 conducted in Małyszyn and Borowo in 2007–2009 (in Polish). *Rośliny Oleiste Oilseed Crops*  
559 XXX. 2009. 2: 207-222.
- 560 39. StatSoft Inc., 2011. Statistica (data analysis software system), version 10.  
561 [www.statsoft.com](http://www.statsoft.com).
- 562 40. Śmiatacz K. The Effect of Sowing Date and Seeding Rate on the Growth, Development and  
563 Yield of Various Winter Rapeseed Cultivars (in Polish). Doctoral Thesis. Department of  
564 Agronomy, Poznań University of Life Sciences, Poland. 2013. pp. 1-151.
- 565 41. Waalen W.M., Stavang J.A., Olsen J.E., Rognli O.A. The relationship between  
566 vernalization saturation and the maintenance of freezing tolerance in winter rapeseed.  
567 *Environ. Exp. Bot.* 2014. 106, pp. 164-173.
- 568 42. West J.S., Kharbanda P.D., Barbetti M.J., Fitt B.D.L. Epidemiology and management of  
569 *Leptosphaeria maculans* (phoma stem canker) on oilseed rape in Australia, Canada and  
570 Europe. *Plant Pathol.* 2001. 50, pp. 10-27.

- 571 43. Wielebski F., Wójtowicz M. Response of winter rape varieties to high nitrogen fertilization  
572 in rye soils in Experimental Station Zielęcín (in Polish). *Rośliny Oleiste – Oilseed Crops*,  
573 XIX. 1998. 2): 507-514.
- 574 44. Wiesler F., Behrens T., Horst W.J. Nitrogen efficiency of contrasting rape ideotypes. In  
575 *Plant Nutrition-Food Security and Sustainability of Agro-Ecosystem*, Horst W.J. et al  
576 (Eds)), kluwer Academic Publishers, USA. 2001. pp: 60-61.
- 577 45. Wittkop B., Snowdon R.J., Friedt W. Status and perspectives of breeding for enhanced yield  
578 and quality of oilseed crops for Europe. *Euphytica*. 2009. 170, pp. 131-140.
- 579 46. Wojnowska T., Sienkiewicz S., Wojtas A. Effect of increasing doses of nitrogen on the  
580 yield and chemical composition of winter rape seeds (in Polish). *Rośliny Oleiste Oilseed*  
581 *Crops XVI*. 1995. 182-187.
- 582 47. Wohlleben, S., Verreet J.-A.: Epidemiologie, Schadrelevanz und Bekämpfung von Phoma  
583 lingam (Teleomorph *Leptosphaeria maculans*) an Winterraps (*Brassica napus* L.var. *napus*)  
584 in: *PflKrankh. PflSchutz* 109, 227–242, 2002.
- 585 48. Wójtowicz, M. Effect of environmental and agronomical factors on quantity and quality of  
586 yield of winter oilseed rape (*Brassica napus* L.) (in Polish), *Monographs and Disseratations*  
587 *IHAR-PIB Radzików*, Poland. 2013. vol. 45, pp. 1–111.
- 588 49. Wójtowicz M., Jajor E., Wójtowicz A., Korbias M., Wielebski F. Effect of sowing density  
589 and nitrogen fertilization on growth and yield of winter oilseed rape. (in Polish). *Fragm.*  
590 *Agron*. 2017. 34, (3), 130-141.
- 591 50. Yusuf R.I., Bullock D.G. Effect of several production factors on two varieties of rapeseed  
592 in the central United States. *J. Plant Nutr*. 1993. 16, pp. 1279-1288.
- 593
